# Supplementary material
Source: PubMed Central journal article supplement (PMC6501597)
Supplement: NIHMS1025286-supplement-pdf1.pdf [file NIHMS1025286-supplement-pdf1.pdf]

**Structure, Volume 26**

**Supplemental Information**

**Atomic Structural Models of Fibrin Oligomers**

**Artem Zhmurov, Anna D. Protopopova, Rustem I. Litvinov, Pavel Zhukov, John W. Weisel, and Valeri Barsegov**

## Atomic structural models of fibrin oligomers

### Supplemental Information

Artem Zhmurov,<sup>1,2</sup> Anna D. Protopopova,<sup>3</sup> Rustem I. Litvinov,<sup>3,4</sup> Pavel Zhukov,<sup>1</sup>  
John W. Weisel,<sup>3,\*</sup> and Valeri Barsegov<sup>1,5,\*,\*\*</sup>

<sup>1</sup>Moscow Institute of Physics & Technology, Dolgoprudny, Moscow Region 141700, Russian Federation

<sup>2</sup>Sechenov University, Moscow 119991, Russian Federation

<sup>3</sup>Department of Cell & Developmental Biology, Perelman School of Medicine, University of Pennsylvania, Philadelphia, PA 19104, USA

<sup>4</sup>Institute of Fundamental Medicine and Biology, Kazan Federal University, Kazan 420008, Russian Federation

<sup>5</sup>Department of Chemistry, University of Massachusetts, Lowell, MA 01854, USA

\*Corresponding authors:

E-mail: [weisel@mail.med.upenn.edu](mailto:weisel@mail.med.upenn.edu) (JWW) and [Valeri\\_Barsegov@uml.edu](mailto:Valeri_Barsegov@uml.edu) (VB)

\*\*Lead contact

*Keywords:* fibrinogen; fibrin; fibrin polymerization; fibrin oligomers; fibrin protofibrils; GPU computing; multiscale modeling; MD simulations

**Table S1. Crystal structures of human fibrinogen and fibrin from Protein Data Bank. Related to STAR Methods.** The table includes various portions of WT fibrin(ogen) and fibrinogen used in the reconstruction of fibrin oligomers.

| <b>PDB code</b>                                                                     | <b>Structure</b>                                              |
|-------------------------------------------------------------------------------------|---------------------------------------------------------------|
| <i>Fibrinogen</i>                                                                   |                                                               |
| 3GHG                                                                                | Human fibrinogen co-crystallized with GPRP and GHRP           |
| <i>D-dimer fragments from crosslinked fibrin</i>                                    |                                                               |
| 1FZB                                                                                | Crosslinked double D fragment                                 |
| 1FZC                                                                                | Fragment double-D from human fibrin with bound ligands        |
| 1FZE                                                                                | Fragment double-D from human fibrin                           |
| 1FZF                                                                                | Fragment double-D from human fibrin with GHRP                 |
| 1N86                                                                                | Human D-dimer from cross-linked fibrin with GPR and GHRPLDK   |
| 1N8E                                                                                | Fragment double-D from human fibrin                           |
| 2HLO                                                                                | Fragment D-dimer from human fibrin with G-hydroxyP-RP         |
| 2HOD                                                                                | Fragment D-dimer from human fibrin with G-hydroxyP-RP         |
| 2HPC                                                                                | Fragment D-dimer from human fibrin with GPRP                  |
| 2Q9I                                                                                | D-dimer from human fibrin with MHRPY                          |
| 2Z4E                                                                                | D-dimer from human fibrin with GHRPY                          |
| 3H32                                                                                | D-dimer from human fibrin with GHRPY                          |
| <i>Fragments D (D-D interactions in a crystal as a result of molecular packing)</i> |                                                               |
| 1FZG                                                                                | Fragment D from human fibrinogen with GHRP                    |
| 2H43                                                                                | Fragment D co-complexed with AHRP                             |
| 2FFD                                                                                | Fibrinogen fragment D with GPRVVE                             |
| 3BVH                                                                                | Recombinant $\gamma$ D364A fibrinogen fragment D with GPRP    |
| 3E1I                                                                                | B $\beta$ D432A variant fibrinogen fragment D with GHRP       |
| 2OYH                                                                                | Fragment D of $\gamma$ D298,301A fibrinogen variant with GHRP |
| 2OYI                                                                                | Fragment D of $\gamma$ D298,301A fibrinogen variant with GHRP |
| 1LT9                                                                                | Recombinant human fibrinogen fragment D                       |
| 1LTJ                                                                                | Recombinant human fibrinogen fragment D with GPRP and GHRP    |
| 1FZA                                                                                | Fibrinogen fragment D                                         |
| 1RE3                                                                                | Fragment D of B $\beta$ D398A fibrinogen variant with GHRP    |
| 1RE4                                                                                | Fragment D of B $\beta$ D398A variant fibrinogen              |
| 1RF1                                                                                | Fragment D of $\gamma$ E132A fibrinogen variant with GHRP     |
| 1RF0                                                                                | Fragment D of $\gamma$ E132A fibrinogen variant               |

**Table S2. Structure and shape characteristics of fibrin protofibrils obtained from AFM experiment and equilibrium Molecular Dynamics simulations. Related to Figure 4.** Shown are the average quantities and standard deviations of the D-D, D-E, and DED-DED distances and the DED-DED-DED angle (distances and angles are calculated using the centers of mass in the simulations and geometric centers in AFM experiments).

| <b>Metric</b>              | <b>AFM</b>     | <b>Simulations</b> |
|----------------------------|----------------|--------------------|
| D-D distance, nm           | $9.2 \pm 1.7$  | $9.0 \pm 0.1$      |
| D-E distance, nm           | $6.7 \pm 1.2$  | $6.3 \pm 0.5$      |
| DED-DED distance, nm       | $22.9 \pm 2.5$ | $22.1 \pm 1.7$     |
| DED-DED-DED angle, degrees | $162 \pm 12$   | $162 \pm 10$       |

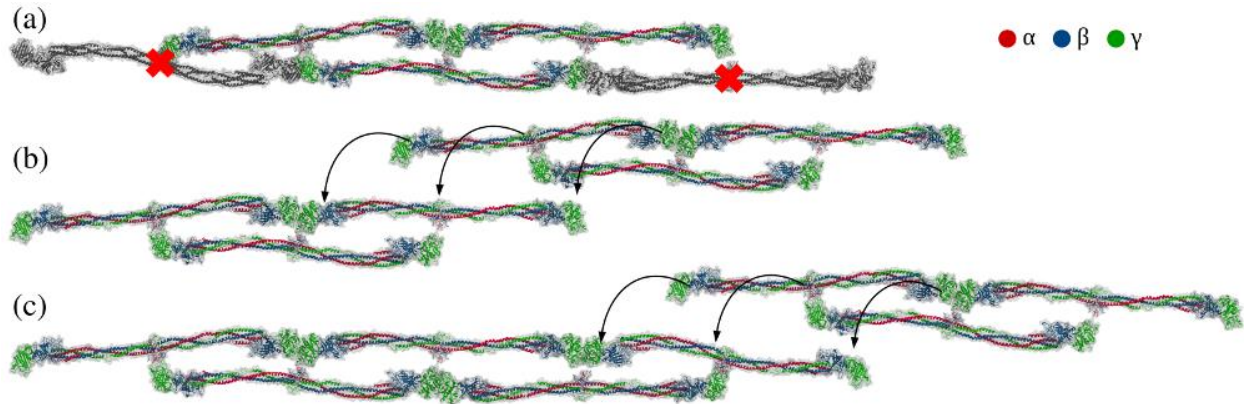

**Figure S1: Schematic illustration of the reconstruction of fibrin protofibril  $FP_{n/m}$ . Related to Figure 1 and STAR Methods.**

(A) Two fibrin molecules in the lower strand are removed from the atomic model of oligomer  $FO_{2/3}$  (shown in gray color and marked by the cross).

(B) Two copies of the obtained oligomer  $FO_{1/2}$  are aligned using Kabsch algorithm (Elongation procedure; see Figure 1B). We overlapped the monomer from  $FO_{1/2}$  at the top with the monomer from  $FO_{1/2}$  at the bottom (connected by the curved arrows).

(C) The result of this operation described in panel B – the fibrin oligomer  $FO_{1/2}$  (bottom structure). This same procedure can be repeated to reconstruct fibrin oligomers  $FO_{3/4}$ ,  $FO_{4/5}$ , etc., up to a protofibril of arbitrary length.

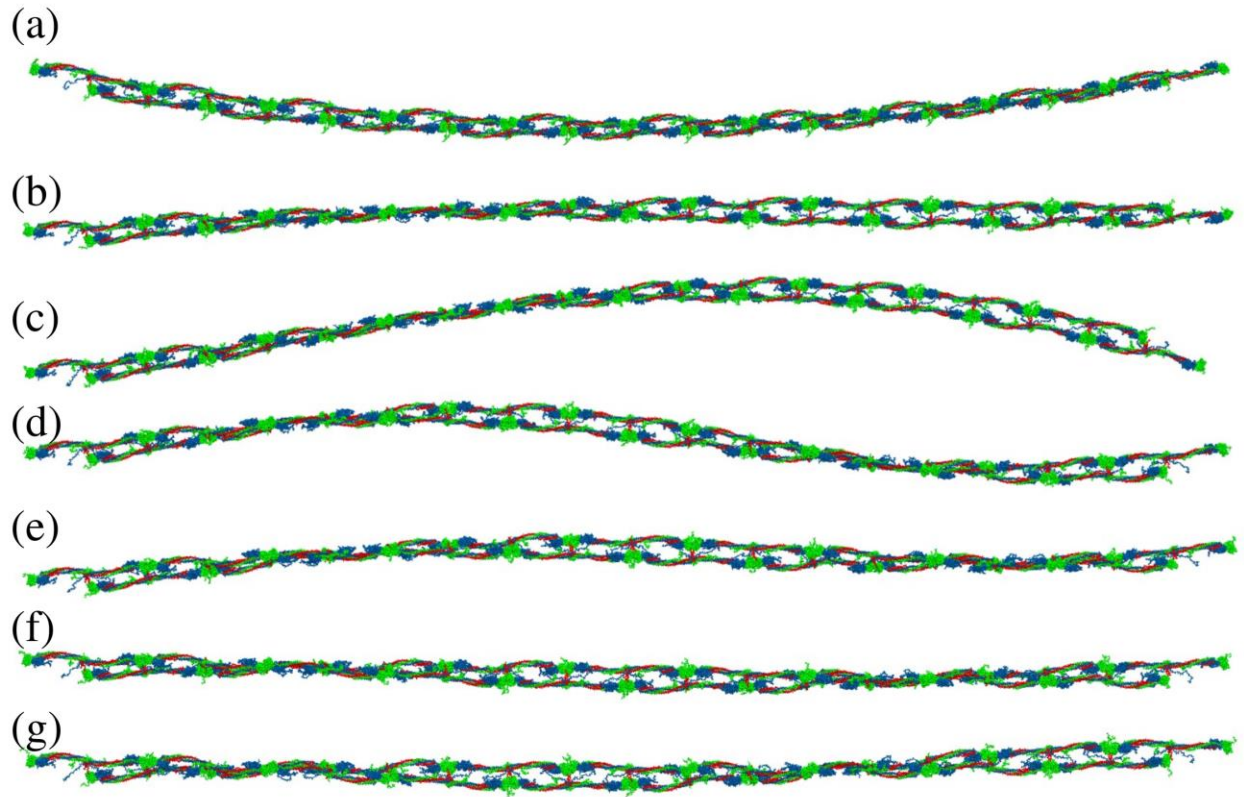

**Figure S2: Twisting of fibrin protofibrils upon transition from the straight to the bent configuration of D:D interface. Related to Figure 3.**

(A) Structures of fibrin protofibril  $FP_{10/9}$  that correspond to the straight conformation of D:D interface (based on PDB structure 1N86).

(B-F) Transient structures detected in the course of transition from the straight to the bent configuration of D:D interface.

(G) Structure of  $FP_{10/9}$  that correspond to the bent configuration of D:D interface (based on PDB structure 1FZG).
